# Supplementary material for: Ryk receptors on unmyelinated nerve fibers mediate excitatory synaptic transmission and CCL2 release during neuropathic pain induced by peripheral nerve injury
Source: PubMed Central journal article supplement — Mol Pain. 2017 May 31;13:1744806917709372. doi: 10.1177/1744806917709372 (PMC5459354; doi:10.1177/1744806917709372), 2017-05-31
Supplement: MPX709372_supplementary_material.pdf [file MPX709372_supplementary_material.pdf]

**Tabel 1. qRT-PCR Primer Sequences**

| <b>GENE</b>                   | <b>FORWARD (5'-3')</b> | <b>REVERSE (5'-3')</b> | <b>ACCESSION</b> |
|-------------------------------|------------------------|------------------------|------------------|
| <b>Ccl2</b>                   | TAGCATCCACGTGCTGTCTC   | GGACCCATTCCTTATTGGGGT  | NM_031530        |
| <b>Ccl4</b>                   | GCTGTCAGCACCAATAGGCT   | AGTTCGGATGAATCTTCCGGG  | NM_053858        |
| <b>Ccl5</b>                   | CCTCACCGTCATCCTCGTTG   | GCGGTCCTTCGAGTGACAA    | NM_031116        |
| <b>Ccl17</b>                  | TGCTCGAGCCACCAATGTAG   | TCCTTGGGACACTCCACTGA   | NM_057151        |
| <b>Ccl21</b>                  | AACATTGTCCGAGGCTACAGG  | AGGTTCTTCGATTCTTCTGTC  | NM_001008513     |
| <b>Cxcl4</b>                  | CCAGGATCCATCTCAAACGCA  | CCCATTCTTCAGCGTGGCTAT  | NM_001007729     |
| <b>Cxcl12</b>                 | CCAGAGCCAACGTCAAACATC  | GGTCAATGCACACTTGTCTGT  | NM_001033883     |
| <b>Il-1<math>\beta</math></b> | ACAAAAATGCCTCGTGCTGTC  | CCACAGGGATTTTGTGCTTGC  | NM_031512        |
| <b>Il-6</b>                   | CTGCTCTGGTCTTCTGGAGTT  | TGCTCTGAATGACTCTGGCTT  | NM_012589        |
| <b>Bdnf</b>                   | GGGTCACAGCGGCAGATAAA   | GCCTTCCTTCGTGTAACCCA   | NM_001270638     |
